# Supplementary material for: Long-Term Water Quality Patterns in an Estuarine Reservoir and the Functional Changes in Relations of Trophic State Variables Depending on the Construction of Serial Weirs in Upstream Reaches
Source: MDPI journal article supplement (doi:10.3390/ijerph182312568), 2021-11-29
Supplement: s1 [file s1]

## Supplementary Materials

**Supplementary Table S1.** Spatial heterogeneities of water quality parameters during 2002-2020, along with range, average, and standard error (SE).

| Category           | Parameter (unit)                   | Rz           |              | Tz           |             | Lz            |             |
|--------------------|------------------------------------|--------------|--------------|--------------|-------------|---------------|-------------|
|                    |                                    | Mean±SE      | (Range)      | Mean±SE      | (Range)     | Mean±SE       | (Range)     |
| Physical factors   | WT(°C)                             | 16.79±0.59   | (1-33.9)     | 15.9±0.55    | (2.2-30.5)  | 16.15±0.56    | (1.7-30.2)  |
|                    | EC (µS/cm)                         | 558.81±38.59 | (109-3422)   | 923.92±52.81 | (100-4726)  | 1139.26±53.73 | (100-5855)  |
|                    | TSS (mg/L)                         | 24.26±1.51   | (1.6-223.6)  | 18.73±0.99   | (1.9-138.7) | 11.51±0.63    | (1.2-91.4)  |
|                    | SD (m)                             | 0.52±0.02    | (0.0-2)      | 0.65±0.03    | (0.0-2.5)   | 1.02±0.05     | (0.0-4.5)   |
|                    | K <sub>na</sub> (m <sup>-1</sup> ) | 1.19±0.11    | (0.65-1.72)  | 1.35±0.15    | (0.74-2.1)  | 0.91±0.13     | (0.37-1.62) |
| Chemical factors   | pH                                 | 7.84±0.04    | (6.0-9.6)    | 7.63±0.03    | (6.4-9.2)   | 7.74±0.03     | (6.6-9.3)   |
|                    | DO (mg/L)                          | 10.02±0.21   | (3.6-21.1)   | 8.78±0.2     | (2.8-18.5)  | 9.61±0.19     | (3.9-17.2)  |
|                    | BOD (mg/L)                         | 2.67±0.09    | (0.3-8.2)    | 2.01±0.07    | (0.2-7.9)   | 1.59±0.07     | (0.3-8.8)   |
|                    | COD (mg/L)                         | 6.6±0.11     | (2.9-12.5)   | 6.03±0.08    | (3.1-9.4)   | 5.77±0.07     | (2.6-9.9)   |
|                    | TN (mg/L)                          | 3.92±0.1     | (0.86-10.17) | 3.63±0.09    | (1.2-9.26)  | 3.48±0.09     | (1.09-8.35) |
|                    | TDN (mg/L)                         | 3.52±0.09    | (0.57-9.69)  | 3.25±0.08    | (1.09-8.14) | 3.11±0.08     | (1.02-6.88) |
|                    | NH <sub>4</sub> -N (mg/L)          | 0.42±0.03    | (0.0-2.8)    | 0.32±0.02    | (0.0-2.55)  | 0.25±0.02     | (0.0-2.71)  |
|                    | NO <sub>3</sub> -N (mg/L)          | 2.32±0.07    | (0.0-5.5)    | 2.25±0.06    | (0.05-5.79) | 2.2±0.06      | (0.05-5.34) |
|                    | TP (µg/L)                          | 129.91±5.43  | (14-676)     | 107.91±4.33  | (17-487)    | 92.04±5.14    | (16-920)    |
|                    | TDP (µg/L)                         | 82.78±4.08   | (7-542)      | 76.63±5.37   | (7-264)     | 65.93±3.15    | (3-291)     |
|                    | PO <sub>4</sub> -P (µg/L)          | 64.4±3.9     | (0.0-515)    | 56.36±3.05   | (0-249)     | 51.07±2.91    | (0-259)     |
|                    | TN:TP                              | 39.1±1.72    | (5.8-134.5)  | 45.1±2.01    | (9.6-148.7) | 55.9±2.82     | (5.0-264.4) |
| Biological factors | FCB (col/100ml)                    | 190.7±43.6   | (0-4967)     | 186.7±48.9   | (0-5861)    | 110.2±28.1    | (0-3467)    |
|                    | CHL-a (µg/L)                       | 21.87±1.61   | (0.0-173.4)  | 12.37±0.94   | (0.01-99.2) | 9.56±0.64     | (0.1-60.8)  |

Rz – riverine zone, Tz – transition zone, Lz – lacustrine zone

**Supplementary Table S2.** Spatial-seasonal variations of water quality parameters during 2020, along with ranges, averages, and standard error (SE).

| Parameter<br>(unit) | Rz                        |                           |                          |                           | Tz                        |                          |                           |                          | Lz                        |                           |                           |                           |                           |
|---------------------|---------------------------|---------------------------|--------------------------|---------------------------|---------------------------|--------------------------|---------------------------|--------------------------|---------------------------|---------------------------|---------------------------|---------------------------|---------------------------|
|                     | Spring                    | Summer                    | Fall                     | Winter                    | Spring                    | Summer                   | Fall                      | Winter                   | Spring                    | Summer                    | Fall                      | Winter                    |                           |
|                     | Mean±SE (Range)           |                           |                          |                           | Mean±SE (Range)           |                          |                           |                          | Mean±SE (Range)           |                           |                           |                           |                           |
| Physical factors    | WT (°C)                   | 14.25±0.69<br>(4.3-23.8)  | 26.95±0.47<br>(14-33.9)  | 20.51±0.65<br>(12-29)     | 5.45±0.32<br>(1-12.9)     | 12.6±0.62<br>(4-20.7)    | 24.66±0.44<br>(16.8-30.5) | 20.54±0.63<br>(13-29)    | 5.81±0.35<br>(2.2-12)     | 12.74±0.65<br>(4-20.5)    | 25.38±0.38<br>(19.1-30.2) | 20.69±0.62<br>(11.4-29.3) | 5.78±0.37<br>(1.7-11.9)   |
|                     | EC (µS/cm)                | 798.5±93.8<br>(141-3422)  | 272±23.9<br>(109-1186)   | 311.9±30.4<br>(110-1209)  | 852.8±93.4<br>(236-3379)  | 1379±132.1<br>(190-4726) | 613.4±83.6<br>(100-2513)  | 469±52.2<br>(109-1769)   | 1233.5±85.0<br>(255-2799) | 1513.6±92.5<br>(220-3661) | 706.12±74.6<br>(108-2740) | 798.7±96.2<br>(100-5127)  | 1538±112.5<br>(449-5855)  |
|                     | TSS (mg/L)                | 17.17±1.56<br>(2-62.8)    | 28.81±3.1<br>(8.8-161.6) | 36.06±4.25<br>(2.4-223.6) | 15.01±1.22<br>(1.6-63.6)  | 12.08±1.31<br>(3.7-70.9) | 24.41±2.64<br>(8-138.7)   | 26.18±1.81<br>(6-64.3)   | 12.24±0.88<br>(1.9-35.3)  | 6.78±0.52<br>(2.2-28.6)   | 13.98±1.85<br>(2.5-91.4)  | 15.17±1.1<br>(2.4-52.4)   | 7.79±0.53<br>(1.2-20.4)   |
|                     | SD (m)                    | 0.68±0.06<br>(0.2-2)      | 0.44±0.03<br>(0.0-1.2)   | 0.35±0.03<br>(0.1-1.2)    | 0.6±0.04<br>(0.2-1.4)     | 0.87-0.07<br>(0.2-2.5)   | 0.52±0.04<br>(0.0-1.3)    | 0.47±0.04<br>(0.1-1.5)   | 0.74±0.04<br>(0.2-1.5)    | 1.57±0.13<br>(0.3-4.5)    | 0.87±0.1<br>(0.1-4)       | 0.63±0.04<br>(0.1-1.3)    | 1.01±0.05<br>(0.2-2)      |
|                     | Kna (m <sup>-1</sup> )    | 0.87±0.07<br>(0.75-0.99)  | 1.28±0.2<br>(0.96-1.66)  | 1.61±0.07<br>(1.48-1.72)  | 1.01±0.23<br>(0.65-1.43)) | 0.89±0.04<br>(0.82-0.96) | 1.67±0.26<br>(1.2-2.1)    | 1.85±0.08<br>(1.74-2.01) | 0.99±0.19<br>(0.74-1.35)  | 0.41±0.02<br>(0.37-0.44)  | 1.17±0.2<br>(0.6-1.62)    | 1.42±0.05<br>(1.36-1.52)  | 0.77±0.15<br>(0.62-1.07)  |
| Chemical factors    | pH                        | 7.89±0.06<br>(6.8-9.2)    | 8.03±0.1<br>(6.0-9.6)    | 7.63±0.07<br>(6.5-9.2)    | 7.83±0.08<br>(6.1-9.4)    | 7.78±0.05<br>(6.8-8.7)   | 7.59±0.07<br>(6.6-9.1)    | 7.43±0.05<br>(6.4-8.7)   | 7.72±0.07<br>(6.4-9.2)    | 7.94±0.05<br>(7.3-9.3)    | 7.74±0.08<br>(6.7-9.2)    | 7.52±0.04<br>(6.8-8.5)    | 7.75±0.06<br>(6.6-8.9)    |
|                     | DO (mg/L)                 | 10.69±0.28<br>(6.1-14.9)  | 7.21±0.25<br>(3.9-12.7)  | 7.98±0.21<br>(4.9-12.4)   | 12.57±0.26<br>(7.8-17.2)  | 9.92±0.3<br>(5-14.6)     | 6.08±0.24<br>(2.8-11.3)   | 7.01±0.19<br>(4.5-11.3)  | 12.11±0.29<br>(6.8-18.5)  | 10.42±0.32<br>(4.1-17.8)  | 8.24±0.33<br>(3.6-14.7)   | 7.98±0.22<br>(5.1-12.2)   | 13.42±0.38<br>(5.9-21.1)  |
|                     | BOD (mg/L)                | 2.68±0.18<br>(0.5-6.1)    | 3.27±0.22<br>(0.9-8.2)   | 2.16±0.11<br>(0.9-4)      | 2.55±0.15<br>(0.3-5)      | 2.18±0.16<br>(0.2-6.3)   | 2.19±0.15<br>(0.7-7.9)    | 1.78±0.11<br>(0.5-4.2)   | 1.9±0.12<br>(0.5-4.6)     | 2.11±0.21<br>(0.3-8.8)    | 1.65±0.13<br>(0.3-6.8)    | 1.1±0.07<br>(0.3-2.5)     | 1.52±0.11<br>(0.3-3.6)    |
|                     | COD (mg/L)                | 6.59±0.18<br>(4.3-10.3)   | 7.38±0.24<br>(3.4-12.5)  | 6.08±0.19<br>(2.9-9.1)    | 6.37±0.22<br>(3-10.6)     | 6.03±0.12<br>(4.2-8.2)   | 6.58±0.18<br>(3.1-9.4)    | 5.72±0.16<br>(3.1-8.8)   | 5.79±0.15<br>(3.5-9.3)    | 5.82±0.12<br>(2.7-7.8)    | 6.41±0.17<br>(2.6-9.9)    | 5.4±0.14<br>(2.7-7.8)     | 5.46±0.12<br>(3.8-8.3)    |
|                     | TN (mg/L)                 | 4.82±0.21<br>(1.27-10.17) | 3.21±0.14<br>(0.86-5.54) | 2.84±0.11<br>(1.67-5.95)  | 4.79±0.19<br>(2.82-9.45)  | 4.61±0.17<br>(1.2-8.63)  | 3.26±0.14<br>(1.36-6.46)  | 2.56±0.1<br>(1.43-5.41)  | 4.08±0.19<br>(2.21-9.26)  | 4.54±0.17<br>(1.09-8.35)  | 3.25±0.15<br>(1.4-7.05)   | 2.42±0.11<br>(1.24-5.63)  | 3.73±0.17<br>(1.74-6.79)  |
|                     | TDN (mg/L)                | 4.48±0.19<br>(1.22-9.69)  | 2.86±0.13<br>(0.57-5.04) | 2.42±0.07<br>(1.36-3.83)  | 4.33±0.17<br>(2.49-8.6)   | 4.29±0.15<br>(1.09-8.06) | 2.9±0.11<br>(1.16-5.44)   | 2.19±0.06<br>(1.27-3.22) | 3.6±0.16<br>(2.11-8.14)   | 4.2±0.13<br>(1.02-6.88)   | 2.89±0.11<br>(1.12-5.71)  | 2.09±0.06<br>(1.22-3.69)  | 3.28±0.13<br>(1.61-6.41)  |
|                     | NH <sub>4</sub> -N (mg/L) | 0.74±0.09<br>(0.01-2.8)   | 0.22±0.03<br>(0.00-1.04) | 0.17±0.02<br>(0.00-0.7)   | 0.55±0.07<br>(0.00-2.49)  | 0.58±0.06<br>(0.03-2.55) | 0.18±0.03<br>(0.01-0.91)  | 0.15±0.03<br>(0.00-1.16) | 0.36±0.04<br>(0.00-1.82)  | 0.49±0.06<br>(0.03-2.71)  | 0.14±0.03<br>(0.00-1.17)  | 0.1±0.02<br>(0.00-0.83)   | 0.28±0.04<br>(0.00-1.52)  |
|                     | NO <sub>3</sub> -N (mg/L) | 2.98±0.12<br>(1.52-5.5)   | 1.66±0.11<br>(0.00-4.33) | 1.78±0.08<br>(0.1-3.32)   | 2.85±0.11<br>(0.03-5.39)  | 2.99±0.12<br>(0.81-5.79) | 1.94±0.11<br>(0.07-3.95)  | 1.56±0.06<br>(0.1-2.76)  | 2.49±0.11<br>(0.05-5.4)   | 3.02±0.1<br>(1.12-5.34)   | 1.95±0.1<br>(0.05-3.6)    | 1.54±0.06<br>(0.08-2.71)  | 2.29±0.11<br>(0.1 - 4.78) |
|                     | TP (µg/L)                 | 124.4±10<br>(14-380)      | 127.6±6.76<br>(25-228)   | 126.7±5.92<br>(54-250)    | 140.9±17.16<br>(32-676)   | 94.5±7.68<br>(17-264)    | 118.1±8.79<br>(28-428)    | 113.7±6.1<br>(43-250)    | 105.4±11.17<br>(27-487)   | 81.2±8.36<br>(16-303)     | 93.9±6.79<br>(20-194)     | 97.5±6.46<br>(31-271)     | 95.5±16.37<br>(23-920)    |

|                    |                           |                           |                          |                          |                          |                          |                          |                           |                          |                           |                           |                         |                          |
|--------------------|---------------------------|---------------------------|--------------------------|--------------------------|--------------------------|--------------------------|--------------------------|---------------------------|--------------------------|---------------------------|---------------------------|-------------------------|--------------------------|
|                    | TDP (µg/L)                | 81.4±7.9<br>(11-210)      | 85.6±6.51<br>(7-195)     | 74.7±4.95<br>(21-172)    | 89.5±4.14<br>(8-542)     | 83.6±18.31<br>(12-240)   | 80.4±5.91<br>(7-213)     | 69.7±4.91<br>(21-154)     | 72.8±8.37<br>(12-264)    | 66.6±8.14<br>(10-291)     | 68.6±5.88<br>(3-189)      | 67.8±4.14<br>(15-148)   | 60.8±6.51<br>(12-217)    |
|                    | PO <sub>4</sub> -P (µg/L) | 63.7±7.75<br>(1-200)      | 65.7±6.24<br>(0.00-185)  | 60.5±4.83<br>(0.00-159)  | 67.8±11.11<br>(0.00-515) | 52.9±6.48<br>(0.00-192)  | 62.5±5.3<br>(3-210)      | 55.2±4.52<br>(4-126)      | 54.9±7.74<br>(0.00-249)  | 48.6±7.22<br>(0.00-259)   | 53.3±5.48<br>(1-184)      | 54.8±4.03<br>(0.00-132) | 47.6±6.21<br>(0.00-175)  |
|                    | TN:TP                     | 49.2±3.44<br>(17.1-134.5) | 30.8±2.58<br>(5.8-108.3) | 24.7±1.26<br>(10.5-53.4) | 51.9±4.14<br>(7.8-134.2) | 64.7±4.53<br>(23.-148.7) | 35.5±2.89<br>(9.9-114.2) | 25.45±1.47<br>(10.9-74.7) | 54.8±4.16<br>(9.6-146.2) | 84.2±7.12<br>(16.5-264.4) | 50.7±5.22<br>(10.8-189.4) | 28.1±1.35<br>(8.9-55.3) | 60.4±4.47<br>(5.0-149.5) |
|                    |                           |                           |                          |                          |                          |                          |                          |                           |                          |                           |                           |                         |                          |
| Biological factors | FCB<br>(col/100ml)        | 98.1±48.61<br>(0-2283)    | 238±98.39<br>(0-4000)    | 270.8±94.02<br>(0-3467)  | 155.2±98.7<br>(0-4967)   | 69±43.31<br>(0-2395)     | 263.5±126.9<br>(0-5861)  | 284.5±108.1<br>(0-3800)   | 128.7±91.8<br>(0-5069)   | 39.8±24.9<br>(0-1376)     | 140.6±61.4<br>(0-1947)    | 167.9±65.2<br>(0-2400)  | 92.3±63.3<br>(0-3467)    |
|                    | CHL-a (µg/L)              | 18.7±3<br>(1.6-112.8)     | 26.9±3.31<br>(0.7-109.8) | 15.56±1.59<br>(0.2-53.7) | 26.3±4.24<br>(0.0-173.4) | 10.29±1.27<br>(0.7-47.4) | 12.85±1.69<br>(0.3-60.2) | 11.05±1.26<br>(0.01-57.3) | 15.29±2.82<br>(0.1-99.2) | 9.28±1.23<br>(0.5-40.7)   | 11.37±1.64<br>(0.2-60.8)  | 8.08±0.89<br>(0.1-29.3) | 9.49±1.21<br>(0.2-44.7)  |

Rz – riverine zone, Tz – transition zone, Lz – lacustrine zone.

**Supplementary Table S3.** Spatial and spatial-seasonal comparisons of water quality parameters in the reservoir during 2002 – 2020.

|                                  |                           |                           | Parameter (unit) | WT     | EC     | TSS    | SD     | K <sub>na</sub> | pH     | DO     | BOD    | COD    | TN     | TDN    | NH <sub>4</sub> -N | NO <sub>3</sub> -N | TP     | TDP   | PO <sub>4</sub> -P | TN:TP  | FCB    | CHL-a  |       |
|----------------------------------|---------------------------|---------------------------|------------------|--------|--------|--------|--------|-----------------|--------|--------|--------|--------|--------|--------|--------------------|--------------------|--------|-------|--------------------|--------|--------|--------|-------|
| Spatial Comparison               | ANOVA on Ranks            | <i>H value</i>            | 1.23             | 94.09  | 113.05 | 100.2  | 81.82  | 20.97           | 17.57  | 112.66 | 37.05  | 11.49  | 10.18  | 19.02  | 1.37               | 48.45              | 10.06  | 5.32  | 20.94              | 10.87  | 58.06  |        |       |
|                                  |                           | <i>p-value</i>            | >0.05            | <0.001 | <0.001 | <0.001 | <0.001 | <0.001          | <0.001 | <0.001 | <0.001 | <0.001 | <0.01  | <0.01  | <0.001             | >0.05              | <0.001 | <0.01 | >0.05              | <0.001 | <0.01  | <0.001 |       |
|                                  | t-test ( <i>p</i> <0.05*) | Rz vs Tz                  |                  | *      | *      | *      | *      |                 | *      | *      | *      |        |        |        |                    | *                  |        |       |                    | *      | *      | *      |       |
|                                  |                           | Rz vs Lz                  |                  | *      | *      | *      | *      | *               | *      | *      | *      | *      | *      | *      | *                  | *                  | *      | *     |                    | *      | *      | *      |       |
|                                  |                           | Tz vs Lz                  |                  | *      | *      | *      | *      | *               | *      | *      | *      | *      |        |        | *                  |                    | *      |       |                    | *      | *      | *      |       |
| Seasonal Comparison on each site | Lz                        | ANOVA on Ranks            | <i>H value</i>   | 176.08 | 76.53  | 73.35  | 60.88  | 44.78           | 32.89  | 134.26 | 22.49  | 29.61  | 90.46  | 114.24 | 61.13              | 96.85              | 9.78   | 6.59  | 6.85               | 67.54  | 11.23  | 1.33   |       |
|                                  |                           |                           | <i>p-value</i>   | <0.001 | <0.001 | <0.001 | <0.001 | <0.001          | <0.001 | <0.001 | <0.001 | <0.001 | <0.001 | <0.001 | <0.001             | <0.001             | <0.001 | <0.05 | >0.05              | >0.05  | <0.001 | <0.05  | >0.05 |
|                                  |                           | t-test ( <i>p</i> <0.05*) | S vs Su          | *      | *      | *      | *      | *               | *      | *      | *      |        |        | *      | *                  | *                  | *      |       |                    |        | *      |        |       |
|                                  |                           |                           | Su vs F          | *      |        |        |        |                 |        |        | *      | *      |        | *      | *                  |                    | *      |       |                    |        | *      |        |       |
|                                  |                           |                           | F vs W           | *      | *      | *      | *      | *               | *      | *      | *      | *      |        | *      | *                  | *                  | *      |       |                    |        | *      |        |       |
|                                  |                           |                           | W vs S           | *      |        |        | *      | *               | *      | *      | *      |        |        | *      | *                  | *                  | *      |       |                    |        | *      |        |       |
|                                  |                           |                           | S vs F           | *      | *      | *      | *      | *               | *      | *      | *      | *      |        | *      | *                  | *                  | *      | *     |                    |        | *      | *      |       |
|                                  |                           |                           | W vs Su          | *      | *      | *      |        |                 |        | *      |        | *      |        |        |                    | *                  |        |       |                    |        |        |        |       |
|                                  | Tz                        | ANOVA on Ranks            | <i>H value</i>   | 173.36 | 73.98  | 77.65  | 40.12  | 21.12           | 27.58  | 138.56 | 5.75   | 25.93  | 96.7   | 114.96 | 58.47              | 90.81              | 10.66  | 6.14  | 6.48               | 75.14  | 17.21  | 1.51   |       |
|                                  |                           |                           | <i>p-value</i>   | <0.001 | <0.001 | <0.001 | <0.001 | <0.001          | <0.001 | <0.001 | <0.001 | >0.05  | <0.001 | <0.001 | <0.001             | <0.001             | <0.001 | <0.05 | >0.05              | >0.05  | <0.001 | <0.001 | >0.05 |
|                                  |                           | t-test ( <i>p</i> <0.05*) | S vs Su          | *      | *      | *      | *      | *               | *      | *      | *      |        |        | *      | *                  | *                  | *      |       |                    |        | *      |        |       |
|                                  |                           |                           | Su vs F          | *      |        |        |        |                 |        |        |        | *      |        | *      | *                  |                    | *      |       |                    |        | *      |        |       |
| F vs W                           |                           |                           | *                | *      | *      | *      | *      | *               | *      | *      |        |        | *      | *      | *                  | *                  |        |       |                    | *      | *      |        |       |
| W vs S                           |                           |                           | *                |        |        |        |        | *               | *      | *      |        |        | *      | *      | *                  | *                  |        |       |                    | *      |        |        |       |
| S vs F                           |                           |                           | *                | *      | *      | *      | *      | *               | *      | *      | *      |        | *      | *      | *                  | *                  |        |       |                    | *      | *      |        |       |
| W vs Su                          |                           |                           | *                | *      | *      | *      |        |                 | *      | *      | *      | *      | *      | *      | *                  | *                  |        |       |                    | *      |        |        |       |
| Rz                               | ANOVA on Ranks            | <i>H value</i>            | 178.26           | 94.03  | 53.31  | 40.73  | 22.94  | 15.39           | 103.32 | 14.36  | 53.02  | 98.12  | 110.64 | 56.57  | 93.72              | 2.39               | 1.39   | 1.39  | 54.71              | 20.03  | 6.16   |        |       |
|                                  |                           | <i>p-value</i>            | <0.001           | <0.001 | <0.001 | <0.001 | <0.001 | <0.01           | <0.001 | <0.01  | <0.001 | <0.001 | <0.001 | <0.001 | <0.001             | <0.001             | >0.05  | >0.05 | >0.05              | <0.001 | <0.001 | >0.05  |       |
|                                  | t-test ( <i>p</i> <0.05*) | S vs Su                   | *                | *      | *      | *      |        |                 | *      |        | *      | *      | *      | *      | *                  | *                  |        |       |                    | *      |        |        |       |
|                                  |                           | Su vs F                   | *                |        |        |        |        | *               | *      | *      |        | *      |        |        |                    |                    |        |       |                    | *      | *      |        |       |
|                                  |                           | F vs W                    | *                | *      | *      | *      | *      | *               | *      | *      |        | *      | *      | *      | *                  | *                  |        |       |                    | *      | *      |        |       |
|                                  |                           | W vs S                    | *                |        |        |        |        | *               | *      | *      |        | *      | *      |        | *                  | *                  |        |       |                    | *      | *      |        |       |
|                                  |                           | S vs F                    | *                | *      | *      | *      | *      | *               | *      | *      | *      | *      | *      | *      | *                  | *                  |        |       |                    | *      | *      |        |       |
|                                  |                           | W vs Su                   | *                | *      | *      | *      |        |                 | *      | *      | *      | *      | *      | *      | *                  | *                  |        |       |                    | *      |        |        |       |

Lz-lacustrine zone, Tz-transition zone, Rz-riverine zone; S-spring, Su-summer, F-fall, W-winter; \**p*<0.05.

**Supplementary Table S4.** The variations in the TSID of the estuarine reservoir altered by the construction of new upper weirs.

|                                                                            | TSID plot statement                                | Whole year (%) | BWCs(%) | AWCs (%) |
|----------------------------------------------------------------------------|----------------------------------------------------|----------------|---------|----------|
| P-I                                                                        | Smaller particles predominate<br>(P - limitation)  | 4.73           | 0.31    | 8.71     |
| P-II                                                                       | Larger particles predominate<br>(Blue green algae) | 5.62           | 1.56    | 9.27     |
| P-III                                                                      | Non-algal light limitation                         | 82.99          | 87.81   | 78.65    |
| P-IV                                                                       | Zooplankton grazing                                | 6.66           | 10.31   | 3.37     |
| BWCs-before upper weir constructions, AWCs –after upper weir constructions |                                                    |                |         |          |

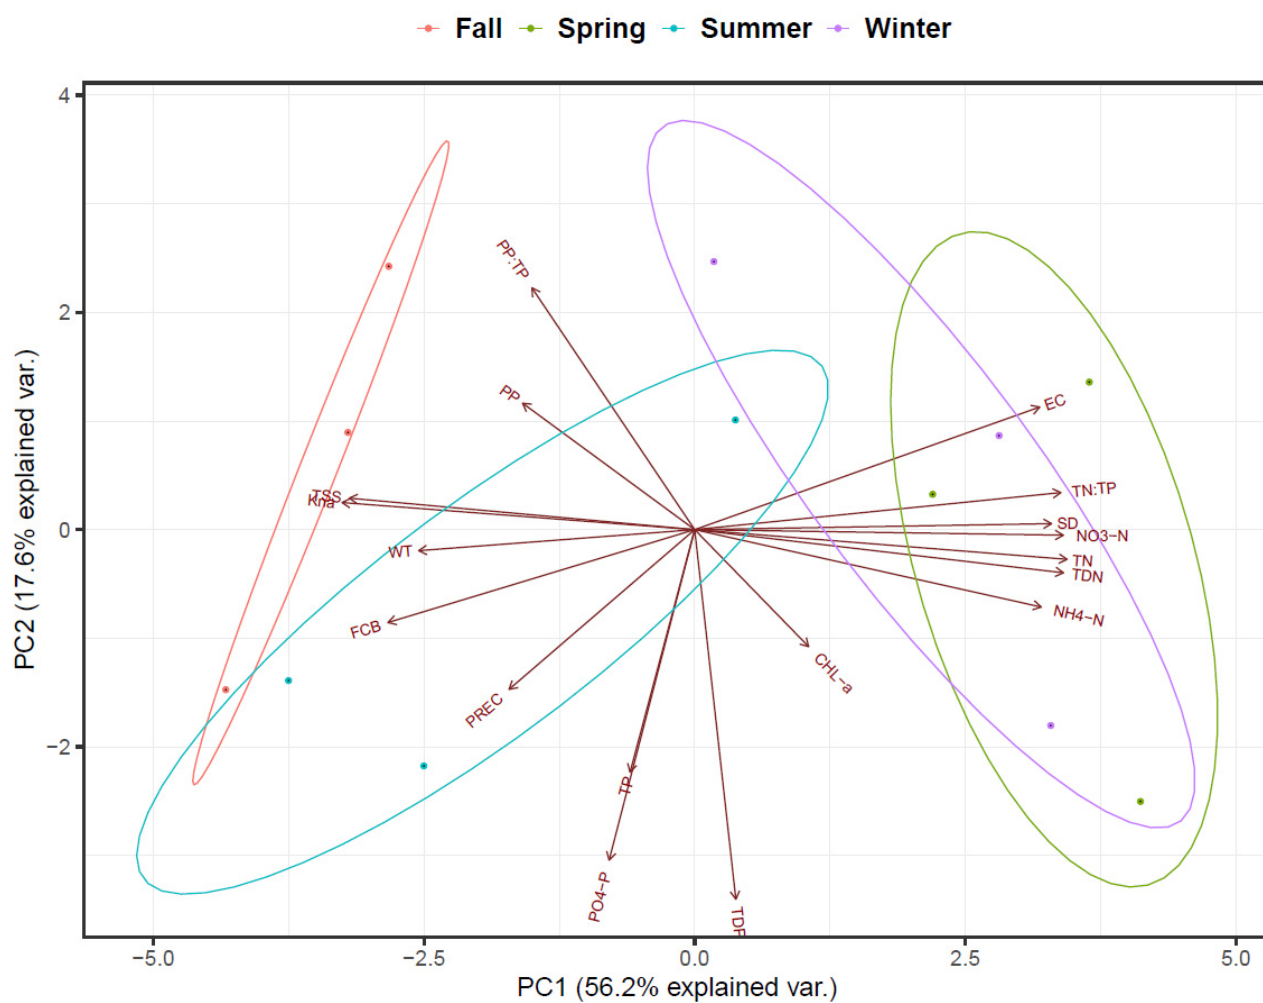

**Supplementary Figure S1.** Biplot showing interrelation among water quality parameters in the estuarine reservoir (PP-particulate phosphorus, PREC-precipitation).
